# Supplementary material for: Outcome-sensitive multiple imputation: a simulation study
Source: Springer Nature journal article supplement (doi:10.1186/s12874-016-0281-5), 2017-01-09

## Supplementary file for “Outcome-sensitive Multiple Imputation: a Simulation Study”

**Table S1: Performance results for covariate X, datasets of 1,000 observations\*†**

|      |                         | % miss | A      | B     | C <sup>‡</sup> | D <sup>‡</sup> | E <sup>‡</sup> | F <sup>‡</sup> | G <sup>‡</sup> |
|------|-------------------------|--------|--------|-------|----------------|----------------|----------------|----------------|----------------|
| MCAR | Mean bias <sup>§</sup>  | 20     | -0.002 | 0.083 | -0.026         | -0.045         | -0.023         | -0.024         | -0.044         |
|      |                         | 40     | -0.012 | 0.162 | -0.058         | -0.085         | -0.056         | -0.061         | -0.083         |
|      |                         | 60     | -0.048 | 0.234 | -0.098         | -0.117         | -0.101         | -0.093         | -0.120         |
|      |                         | 80     | -0.076 | 0.316 | -0.191         | -0.141         | -0.116         | -0.170         | -0.127         |
|      | Mean error <sup>§</sup> | 20     | 0.186  | 0.163 | 0.165          | 0.151          | 0.164          | 0.165          | 0.152          |
|      |                         | 40     | 0.254  | 0.204 | 0.195          | 0.175          | 0.188          | 0.194          | 0.177          |
|      |                         | 60     | 0.397  | 0.260 | 0.263          | 0.237          | 0.269          | 0.261          | 0.240          |
|      |                         | 80     | 0.843  | 0.340 | 0.553          | 0.451          | 0.504          | 0.528          | 0.428          |
|      | Coverage                | 20     | 0.949  | 0.959 | 0.960          | 0.980          | 0.972          | 0.964          | 0.974          |
|      |                         | 40     | 0.943  | 0.972 | 0.983          | 0.987          | 0.982          | 0.985          | 0.984          |
|      |                         | 60     | 0.960  | 0.986 | 0.990          | 0.971          | 0.985          | 0.987          | 0.970          |
|      |                         | 80     | 0.996  | 0.999 | 0.994          | 0.957          | 0.992          | 0.998          | 0.963          |
|      | Power                   | 20     | 0.855  | 0.960 | 0.863          | 0.872          | 0.870          | 0.855          | 0.876          |
|      |                         | 40     | 0.625  | 0.932 | 0.608          | 0.680          | 0.628          | 0.630          | 0.670          |
|      |                         | 60     | 0.339  | 0.841 | 0.303          | 0.423          | 0.322          | 0.320          | 0.413          |
|      |                         | 80     | 0.093  | 0.414 | 0.104          | 0.182          | 0.103          | 0.110          | 0.188          |
| MAR  | Mean bias <sup>§</sup>  | 20     | 0.003  | 0.065 | -0.012         | -0.027         | -0.018         | -0.012         | -0.026         |
|      |                         | 40     | -0.007 | 0.121 | -0.035         | -0.052         | -0.029         | -0.034         | -0.053         |
|      |                         | 60     | -0.014 | 0.228 | -0.073         | -0.102         | -0.075         | -0.075         | -0.106         |
|      |                         | 80     | -0.096 | 0.292 | -0.097         | -0.055         | -0.089         | -0.079         | -0.038         |
|      | Mean error <sup>§</sup> | 20     | 0.176  | 0.158 | 0.161          | 0.152          | 0.158          | 0.161          | 0.152          |
|      |                         | 40     | 0.206  | 0.173 | 0.177          | 0.165          | 0.181          | 0.179          | 0.170          |
|      |                         | 60     | 0.336  | 0.253 | 0.258          | 0.241          | 0.258          | 0.252          | 0.241          |
|      |                         | 80     | 0.687  | 0.311 | 0.544          | 0.461          | 0.494          | 0.525          | 0.446          |
|      | Coverage                | 20     | 0.939  | 0.956 | 0.959          | 0.967          | 0.961          | 0.960          | 0.972          |
|      |                         | 40     | 0.956  | 0.969 | 0.975          | 0.974          | 0.975          | 0.976          | 0.973          |
|      |                         | 60     | 0.957  | 0.989 | 0.982          | 0.965          | 0.982          | 0.984          | 0.962          |
|      |                         | 80     | 0.979  | 0.994 | 0.966          | 0.947          | 0.979          | 0.970          | 0.955          |
|      | Power                   | 20     | 0.887  | 0.965 | 0.902          | 0.900          | 0.896          | 0.897          | 0.916          |
|      |                         | 40     | 0.760  | 0.955 | 0.756          | 0.776          | 0.777          | 0.763          | 0.775          |
|      |                         | 60     | 0.400  | 0.882 | 0.368          | 0.433          | 0.399          | 0.383          | 0.441          |
|      |                         | 80     | 0.190  | 0.584 | 0.172          | 0.217          | 0.163          | 0.186          | 0.235          |
| MNAR | Mean bias <sup>§</sup>  | 20     | 0.002  | 0.079 | -0.021         | -0.040         | -0.029         | -0.020         | -0.041         |
|      |                         | 40     | -0.008 | 0.152 | -0.060         | -0.097         | -0.058         | -0.056         | -0.096         |
|      |                         | 60     | -0.033 | 0.236 | -0.109         | -0.151         | -0.122         | -0.109         | -0.158         |
|      |                         | 80     | -0.024 | 0.281 | -0.054         | -0.065         | -0.068         | -0.057         | -0.043         |
|      | Mean error <sup>§</sup> | 20     | 0.191  | 0.171 | 0.171          | 0.158          | 0.168          | 0.170          | 0.156          |
|      |                         | 40     | 0.334  | 0.238 | 0.258          | 0.232          | 0.246          | 0.260          | 0.232          |
|      |                         | 60     | 0.426  | 0.271 | 0.305          | 0.302          | 0.311          | 0.313          | 0.302          |
|      |                         | 80     | 0.893  | 0.441 | 0.819          | 0.765          | 0.764          | 0.835          | 0.680          |
|      | Coverage                | 20     | 0.936  | 0.966 | 0.957          | 0.967          | 0.974          | 0.960          | 0.976          |
|      |                         | 40     | 0.940  | 0.986 | 0.981          | 0.974          | 0.985          | 0.978          | 0.973          |
|      |                         | 60     | 0.964  | 0.994 | 0.989          | 0.950          | 0.983          | 0.980          | 0.954          |
|      |                         | 80     | 0.992  | 1.000 | 0.993          | 0.970          | 0.995          | 0.995          | 0.973          |

|  |       | % miss | A     | B     | C <sup>‡</sup> | D <sup>‡</sup> | E <sup>‡</sup> | F <sup>‡</sup> | G <sup>‡</sup> |
|--|-------|--------|-------|-------|----------------|----------------|----------------|----------------|----------------|
|  | Power | 20     | 0.826 | 0.930 | 0.836          | 0.842          | 0.810          | 0.834          | 0.833          |
|  |       | 40     | 0.445 | 0.723 | 0.415          | 0.435          | 0.432          | 0.420          | 0.424          |
|  |       | 60     | 0.283 | 0.731 | 0.253          | 0.313          | 0.257          | 0.258          | 0.307          |
|  |       | 80     | 0.050 | 0.056 | 0.037          | 0.084          | 0.051          | 0.053          | 0.090          |

\*Analysis model A: complete case analysis (no multiple imputation [mi]); B: no outcome imputation, not included in mi model; C: no outcome imputation, outcome imputed in mi model; D: outcome imputed and included in mi model; E: outcome imputed and included in mi model but then observations where it was imputed are deleted; F as in C but also including a second correlated outcome in the mi model; G as in D but also including a second correlated outcome in the mi model.

† Analysis model H does not include the covariate and hence not reported.

‡ Main models of interest, other models provided for comparison purposes.

§ Reported on log-odds scale and based on a true effect of log(1.5)

**Table S2: Performance results for interaction term E\*X, datasets of 1,000 observations\*†**

|       |                         | % miss | A      | B     | C <sup>‡</sup> | D <sup>‡</sup> | E <sup>‡</sup> | F <sup>‡</sup> | G <sup>‡</sup> |
|-------|-------------------------|--------|--------|-------|----------------|----------------|----------------|----------------|----------------|
| MCAR  | Mean bias <sup>§</sup>  | 20     | -0.006 | 0.038 | 0.031          | 0.063          | 0.034          | 0.030          | 0.061          |
|       |                         | 40     | -0.003 | 0.080 | 0.073          | 0.115          | 0.066          | 0.077          | 0.114          |
|       |                         | 60     | 0.011  | 0.125 | 0.117          | 0.148          | 0.106          | 0.119          | 0.155          |
|       |                         | 80     | -0.117 | 0.153 | 0.165          | 0.176          | 0.147          | 0.172          | 0.178          |
|       | Mean error <sup>§</sup> | 20     | 0.219  | 0.178 | 0.181          | 0.153          | 0.181          | 0.180          | 0.154          |
|       |                         | 40     | 0.310  | 0.195 | 0.194          | 0.151          | 0.192          | 0.199          | 0.154          |
|       |                         | 60     | 0.488  | 0.214 | 0.217          | 0.158          | 0.217          | 0.216          | 0.163          |
|       |                         | 80     | 1.120  | 0.249 | 0.288          | 0.177          | 0.266          | 0.278          | 0.180          |
|       | Coverage                | 20     | 0.942  | 0.977 | 0.979          | 0.991          | 0.977          | 0.979          | 0.991          |
|       |                         | 40     | 0.931  | 0.993 | 0.992          | 0.997          | 0.992          | 0.993          | 0.996          |
|       |                         | 60     | 0.963  | 1.000 | 1.000          | 1.000          | 1.000          | 0.998          | 0.998          |
|       |                         | 80     | 0.996  | 1.000 | 1.000          | 1.000          | 1.000          | 1.000          | 1.000          |
| Power | 20                      | 0.733  | 0.822  | 0.812 | 0.902          | 0.829          | 0.813          | 0.908          |                |
|       | 40                      | 0.452  | 0.682  | 0.658 | 0.939          | 0.650          | 0.660          | 0.937          |                |
|       | 60                      | 0.238  | 0.436  | 0.388 | 0.945          | 0.363          | 0.381          | 0.956          |                |
|       | 80                      | 0.032  | 0.066  | 0.027 | 0.850          | 0.036          | 0.036          | 0.857          |                |
| MAR   | Mean bias <sup>§</sup>  | 20     | -0.003 | 0.094 | 0.034          | 0.061          | 0.037          | 0.034          | 0.061          |
|       |                         | 40     | -0.024 | 0.175 | 0.063          | 0.112          | 0.072          | 0.067          | 0.110          |
|       |                         | 60     | -0.060 | 0.148 | 0.098          | 0.146          | 0.106          | 0.096          | 0.149          |
|       |                         | 80     | -0.078 | 0.221 | 0.141          | 0.178          | 0.149          | 0.126          | 0.179          |
|       | Mean error <sup>§</sup> | 20     | 0.226  | 0.197 | 0.185          | 0.158          | 0.177          | 0.185          | 0.158          |
|       |                         | 40     | 0.296  | 0.234 | 0.187          | 0.150          | 0.192          | 0.190          | 0.150          |
|       |                         | 60     | 0.464  | 0.216 | 0.204          | 0.158          | 0.210          | 0.205          | 0.157          |
|       |                         | 80     | 1.248  | 0.288 | 0.265          | 0.180          | 0.272          | 0.267          | 0.181          |
|       | Coverage                | 20     | 0.939  | 0.964 | 0.985          | 0.992          | 0.982          | 0.980          | 0.992          |
|       |                         | 40     | 0.957  | 0.981 | 0.996          | 0.998          | 0.990          | 0.997          | 0.998          |
|       |                         | 60     | 0.959  | 0.997 | 1.000          | 1.000          | 1.000          | 1.000          | 1.000          |
|       |                         | 80     | 0.990  | 1.000 | 1.000          | 1.000          | 1.000          | 1.000          | 1.000          |
| Power | 20                      | 0.722  | 0.885  | 0.801 | 0.916          | 0.822          | 0.808          | 0.916          |                |
|       | 40                      | 0.466  | 0.836  | 0.678 | 0.935          | 0.672          | 0.670          | 0.940          |                |
|       | 60                      | 0.217  | 0.500  | 0.353 | 0.942          | 0.376          | 0.381          | 0.959          |                |
|       | 80                      | 0.048  | 0.114  | 0.040 | 0.896          | 0.050          | 0.043          | 0.891          |                |
| MNAR  | Mean bias <sup>§</sup>  | 20     | -0.001 | 0.090 | 0.038          | 0.067          | 0.044          | 0.038          | 0.066          |
|       |                         | 40     | -0.003 | 0.169 | 0.078          | 0.121          | 0.076          | 0.075          | 0.115          |
|       |                         | 60     | -0.024 | 0.168 | 0.110          | 0.149          | 0.112          | 0.111          | 0.153          |
|       |                         | 80     | 0.003  | 0.237 | 0.203          | 0.177          | 0.201          | 0.179          | 0.184          |
|       | Mean error <sup>§</sup> | 20     | 0.238  | 0.198 | 0.193          | 0.163          | 0.188          | 0.191          | 0.161          |
|       |                         | 40     | 0.419  | 0.276 | 0.243          | 0.177          | 0.227          | 0.243          | 0.172          |
|       |                         | 60     | 0.518  | 0.245 | 0.218          | 0.162          | 0.231          | 0.218          | 0.164          |
|       |                         | 80     | 1.413  | 0.409 | 0.421          | 0.201          | 0.431          | 0.437          | 0.203          |
|       | Coverage                | 20     | 0.936  | 0.967 | 0.977          | 0.994          | 0.981          | 0.983          | 0.991          |
|       |                         | 40     | 0.941  | 0.990 | 0.996          | 1.000          | 0.996          | 0.994          | 1.000          |
|       |                         | 60     | 0.966  | 0.999 | 1.000          | 1.000          | 1.000          | 1.000          | 1.000          |
|       |                         | 80     | 0.992  | 1.000 | 1.000          | 1.000          | 1.000          | 1.000          | 1.000          |
| Power | 20                      | 0.675  | 0.831  | 0.773 | 0.867          | 0.780          | 0.765          | 0.881          |                |
|       | 40                      | 0.323  | 0.535  | 0.396 | 0.693          | 0.393          | 0.399          | 0.672          |                |
|       | 60                      | 0.173  | 0.388  | 0.264 | 0.828          | 0.284          | 0.269          | 0.864          |                |
|       | 80                      | 0.023  | 0.009  | 0.000 | 0.169          | 0.002          | 0.006          | 0.202          |                |

\*Analysis model A: complete case analysis (no multiple imputation [mi]); B: no outcome imputation, not included in mi model; C: no outcome imputation, outcome imputed in mi model; D: outcome imputed and included in mi model; E: outcome imputed and included in mi model but then observations where it was imputed are deleted; F as in C but also including a second correlated outcome in the mi model; G as in D but also including a second correlated outcome in the mi model.

† Analysis model H does not include the covariate and hence not reported.

‡ Main models of interest, other models provided for comparison purposes.

§ Reported on log-odds scale and based on a true effect of  $\log(1.2)$

**Table S3: Performance results for covariate X, datasets of 10,000 observations\*†**

|      |                         | % miss | A      | B     | C <sup>‡</sup> | D <sup>‡</sup> | E <sup>‡</sup> | F <sup>‡</sup> | G <sup>‡</sup> |
|------|-------------------------|--------|--------|-------|----------------|----------------|----------------|----------------|----------------|
| MCAR | Mean bias <sup>§</sup>  | 20     | -0.003 | 0.081 | -0.026         | -0.045         | -0.026         | -0.026         | -0.045         |
|      |                         | 40     | -0.002 | 0.164 | -0.049         | -0.077         | -0.049         | -0.050         | -0.075         |
|      |                         | 60     | 0.001  | 0.248 | -0.069         | -0.098         | -0.073         | -0.068         | -0.096         |
|      |                         | 80     | -0.040 | 0.318 | -0.116         | -0.118         | -0.101         | -0.112         | -0.117         |
|      | Mean error <sup>§</sup> | 20     | 0.056  | 0.086 | 0.054          | 0.058          | 0.053          | 0.054          | 0.059          |
|      |                         | 40     | 0.078  | 0.164 | 0.071          | 0.083          | 0.071          | 0.072          | 0.082          |
|      |                         | 60     | 0.111  | 0.248 | 0.095          | 0.108          | 0.099          | 0.095          | 0.107          |
|      |                         | 80     | 0.233  | 0.318 | 0.170          | 0.164          | 0.163          | 0.167          | 0.163          |
|      | Coverage                | 20     | 0.945  | 0.815 | 0.955          | 0.932          | 0.958          | 0.954          | 0.923          |
|      |                         | 40     | 0.941  | 0.500 | 0.951          | 0.888          | 0.943          | 0.947          | 0.890          |
|      |                         | 60     | 0.955  | 0.318 | 0.964          | 0.883          | 0.949          | 0.960          | 0.870          |
|      |                         | 80     | 0.941  | 0.511 | 0.955          | 0.884          | 0.960          | 0.950          | 0.881          |
|      | Power                   | 20     | 1.000  | 1.000 | 1.000          | 1.000          | 1.000          | 1.000          | 1.000          |
|      |                         | 40     | 1.000  | 1.000 | 1.000          | 1.000          | 1.000          | 1.000          | 1.000          |
|      |                         | 60     | 0.995  | 1.000 | 0.999          | 1.000          | 0.999          | 0.999          | 1.000          |
|      |                         | 80     | 0.631  | 1.000 | 0.778          | 0.889          | 0.809          | 0.790          | 0.905          |
| MAR  | Mean bias <sup>§</sup>  | 20     | -0.004 | 0.060 | -0.020         | -0.034         | -0.019         | -0.020         | -0.033         |
|      |                         | 40     | 0.002  | 0.126 | -0.026         | -0.045         | -0.026         | -0.025         | -0.043         |
|      |                         | 60     | -0.001 | 0.229 | -0.056         | -0.081         | -0.059         | -0.057         | -0.079         |
|      |                         | 80     | -0.017 | 0.301 | -0.059         | -0.065         | -0.052         | -0.057         | -0.061         |
|      | Mean error <sup>§</sup> | 20     | 0.054  | 0.069 | 0.052          | 0.054          | 0.048          | 0.052          | 0.053          |
|      |                         | 40     | 0.061  | 0.126 | 0.058          | 0.062          | 0.060          | 0.058          | 0.062          |
|      |                         | 60     | 0.105  | 0.229 | 0.092          | 0.099          | 0.088          | 0.092          | 0.099          |
|      |                         | 80     | 0.182  | 0.301 | 0.153          | 0.145          | 0.149          | 0.151          | 0.144          |
|      | Coverage                | 20     | 0.939  | 0.873 | 0.946          | 0.934          | 0.965          | 0.948          | 0.936          |
|      |                         | 40     | 0.970  | 0.655 | 0.970          | 0.944          | 0.957          | 0.971          | 0.941          |
|      |                         | 60     | 0.944  | 0.340 | 0.952          | 0.873          | 0.957          | 0.952          | 0.900          |
|      |                         | 80     | 0.949  | 0.398 | 0.953          | 0.924          | 0.952          | 0.947          | 0.928          |
|      | Power                   | 20     | 1.000  | 1.000 | 1.000          | 1.000          | 1.000          | 1.000          | 1.000          |
|      |                         | 40     | 1.000  | 1.000 | 1.000          | 1.000          | 1.000          | 1.000          | 1.000          |
|      |                         | 60     | 1.000  | 1.000 | 0.999          | 1.000          | 1.000          | 1.000          | 1.000          |
|      |                         | 80     | 0.843  | 1.000 | 0.891          | 0.924          | 0.901          | 0.883          | 0.930          |
| MNAR | Mean bias <sup>§</sup>  | 20     | -0.002 | 0.076 | -0.026         | -0.045         | -0.025         | -0.025         | -0.046         |
|      |                         | 40     | -0.001 | 0.154 | -0.049         | -0.084         | -0.052         | -0.048         | -0.086         |
|      |                         | 60     | 0.000  | 0.242 | -0.084         | -0.129         | -0.098         | -0.083         | -0.128         |
|      |                         | 80     | 0.006  | 0.304 | -0.055         | -0.077         | -0.049         | -0.058         | -0.069         |
|      | Mean error <sup>§</sup> | 20     | 0.060  | 0.082 | 0.058          | 0.061          | 0.053          | 0.058          | 0.062          |
|      |                         | 40     | 0.092  | 0.156 | 0.087          | 0.100          | 0.088          | 0.085          | 0.101          |
|      |                         | 60     | 0.115  | 0.242 | 0.108          | 0.138          | 0.121          | 0.108          | 0.136          |
|      |                         | 80     | 0.308  | 0.304 | 0.240          | 0.229          | 0.252          | 0.238          | 0.226          |
|      | Coverage                | 20     | 0.950  | 0.849 | 0.959          | 0.946          | 0.972          | 0.958          | 0.941          |
|      |                         | 40     | 0.947  | 0.770 | 0.965          | 0.923          | 0.955          | 0.965          | 0.919          |
|      |                         | 60     | 0.965  | 0.456 | 0.942          | 0.822          | 0.925          | 0.947          | 0.800          |
|      |                         | 80     | 0.964  | 0.960 | 0.964          | 0.951          | 0.960          | 0.965          | 0.935          |
|      | Power                   | 20     | 1.000  | 1.000 | 1.000          | 1.000          | 1.000          | 1.000          | 1.000          |
|      |                         | 40     | 1.000  | 1.000 | 1.000          | 1.000          | 0.999          | 1.000          | 1.000          |
|      |                         | 60     | 0.996  | 1.000 | 0.999          | 0.999          | 0.996          | 0.997          | 0.999          |
|      |                         | 80     | 0.412  | 0.999 | 0.439          | 0.546          | 0.472          | 0.456          | 0.574          |

\*Analysis model A: complete case analysis (no multiple imputation [mi]); B: no outcome imputation, not included in mi model; C: no outcome imputation, outcome imputed in mi model; D: outcome imputed and included in mi model; E: outcome imputed and included in mi model but then observations where it was imputed are deleted; F as in C but also including a second correlated outcome in the mi model; G as in D but also including a second correlated outcome in the mi model.

† Analysis model H does not include the covariate and hence not reported.

‡ Main models of interest, other models provided for comparison purposes.

§ Reported on log-odds scale and based on a true effect of  $\log(1.5)$

**Table S4: Performance results for interaction term E\*X, datasets of 10,000 observations\*†**

|      |                         | % miss | A      | B     | C <sup>‡</sup> | D <sup>‡</sup> | E <sup>‡</sup> | F <sup>‡</sup> | G <sup>‡</sup> |
|------|-------------------------|--------|--------|-------|----------------|----------------|----------------|----------------|----------------|
| MCAR | Mean bias <sup>§</sup>  | 20     | 0.001  | 0.043 | 0.038          | 0.066          | 0.037          | 0.037          | 0.066          |
|      |                         | 40     | 0.002  | 0.081 | 0.073          | 0.118          | 0.073          | 0.076          | 0.115          |
|      |                         | 60     | 0.000  | 0.115 | 0.110          | 0.154          | 0.107          | 0.109          | 0.152          |
|      |                         | 80     | 0.027  | 0.157 | 0.152          | 0.175          | 0.144          | 0.152          | 0.176          |
|      | Mean error <sup>§</sup> | 20     | 0.069  | 0.066 | 0.064          | 0.074          | 0.063          | 0.065          | 0.074          |
|      |                         | 40     | 0.096  | 0.090 | 0.085          | 0.118          | 0.082          | 0.087          | 0.115          |
|      |                         | 60     | 0.135  | 0.118 | 0.113          | 0.154          | 0.112          | 0.113          | 0.152          |
|      |                         | 80     | 0.285  | 0.159 | 0.154          | 0.175          | 0.148          | 0.154          | 0.176          |
|      | Coverage                | 20     | 0.940  | 0.955 | 0.966          | 0.948          | 0.964          | 0.961          | 0.944          |
|      |                         | 40     | 0.941  | 0.956 | 0.963          | 0.866          | 0.965          | 0.953          | 0.878          |
|      |                         | 60     | 0.960  | 0.970 | 0.987          | 0.757          | 0.987          | 0.986          | 0.784          |
|      |                         | 80     | 0.943  | 0.996 | 0.999          | 0.695          | 1.000          | 0.998          | 0.648          |
|      | Power                   | 20     | 1.000  | 1.000 | 1.000          | 1.000          | 1.000          | 1.000          | 1.000          |
|      |                         | 40     | 1.000  | 1.000 | 1.000          | 1.000          | 1.000          | 1.000          | 1.000          |
|      |                         | 60     | 0.988  | 1.000 | 1.000          | 1.000          | 1.000          | 1.000          | 1.000          |
|      |                         | 80     | 0.558  | 1.000 | 1.000          | 1.000          | 1.000          | 1.000          | 1.000          |
| MAR  | Mean bias <sup>§</sup>  | 20     | 0.001  | 0.095 | 0.035          | 0.063          | 0.035          | 0.036          | 0.063          |
|      |                         | 40     | -0.006 | 0.178 | 0.072          | 0.114          | 0.073          | 0.070          | 0.111          |
|      |                         | 60     | -0.001 | 0.158 | 0.109          | 0.152          | 0.112          | 0.109          | 0.151          |
|      |                         | 80     | -0.010 | 0.210 | 0.150          | 0.176          | 0.146          | 0.146          | 0.176          |
|      | Mean error <sup>§</sup> | 20     | 0.070  | 0.101 | 0.064          | 0.071          | 0.061          | 0.064          | 0.071          |
|      |                         | 40     | 0.087  | 0.178 | 0.081          | 0.114          | 0.084          | 0.080          | 0.112          |
|      |                         | 60     | 0.131  | 0.158 | 0.113          | 0.152          | 0.115          | 0.113          | 0.151          |
|      |                         | 80     | 0.292  | 0.210 | 0.152          | 0.176          | 0.148          | 0.148          | 0.176          |
|      | Coverage                | 20     | 0.935  | 0.817 | 0.952          | 0.930          | 0.963          | 0.951          | 0.936          |
|      |                         | 40     | 0.957  | 0.597 | 0.971          | 0.885          | 0.959          | 0.973          | 0.893          |
|      |                         | 60     | 0.951  | 0.913 | 0.983          | 0.795          | 0.979          | 0.987          | 0.789          |
|      |                         | 80     | 0.951  | 0.981 | 0.999          | 0.640          | 0.998          | 0.998          | 0.627          |
|      | Power                   | 20     | 1.000  | 1.000 | 1.000          | 1.000          | 1.000          | 1.000          | 1.000          |
|      |                         | 40     | 1.000  | 1.000 | 1.000          | 1.000          | 1.000          | 1.000          | 1.000          |
|      |                         | 60     | 0.981  | 1.000 | 1.000          | 1.000          | 1.000          | 1.000          | 1.000          |
|      |                         | 80     | 0.497  | 1.000 | 1.000          | 1.000          | 1.000          | 1.000          | 1.000          |
| MNAR | Mean bias <sup>§</sup>  | 20     | 0.001  | 0.088 | 0.040          | 0.068          | 0.037          | 0.039          | 0.065          |
|      |                         | 40     | 0.000  | 0.169 | 0.080          | 0.118          | 0.072          | 0.080          | 0.116          |
|      |                         | 60     | -0.008 | 0.165 | 0.111          | 0.151          | 0.111          | 0.110          | 0.151          |
|      |                         | 80     | -0.009 | 0.222 | 0.148          | 0.176          | 0.147          | 0.149          | 0.175          |
|      | Mean error <sup>§</sup> | 20     | 0.074  | 0.097 | 0.068          | 0.077          | 0.064          | 0.068          | 0.074          |
|      |                         | 40     | 0.115  | 0.170 | 0.095          | 0.119          | 0.090          | 0.095          | 0.116          |
|      |                         | 60     | 0.149  | 0.166 | 0.115          | 0.151          | 0.115          | 0.115          | 0.151          |
|      |                         | 80     | 0.453  | 0.227 | 0.164          | 0.176          | 0.163          | 0.164          | 0.175          |
|      | Coverage                | 20     | 0.933  | 0.878 | 0.959          | 0.940          | 0.974          | 0.960          | 0.949          |
|      |                         | 40     | 0.959  | 0.832 | 0.983          | 0.957          | 0.981          | 0.982          | 0.959          |
|      |                         | 60     | 0.952  | 0.933 | 0.987          | 0.863          | 0.991          | 0.990          | 0.853          |
|      |                         | 80     | 0.957  | 0.998 | 1.000          | 0.987          | 1.000          | 1.000          | 0.993          |
|      | Power                   | 20     | 1.000  | 1.000 | 1.000          | 1.000          | 1.000          | 1.000          | 1.000          |
|      |                         | 40     | 0.997  | 1.000 | 1.000          | 1.000          | 1.000          | 1.000          | 1.000          |
|      |                         | 60     | 0.947  | 1.000 | 1.000          | 1.000          | 1.000          | 1.000          | 1.000          |
|      |                         | 80     | 0.217  | 0.965 | 0.883          | 1.000          | 0.879          | 0.902          | 1.000          |

\*Analysis model A: complete case analysis (no multiple imputation [mi]); B: no outcome imputation, not included in mi model; C: no outcome imputation, outcome imputed in mi model; D: outcome imputed and included in mi model; E: outcome imputed and included in mi model but then observations where it was imputed are deleted; F as in C but also including a second correlated outcome in the mi model; G as in D but also including a second correlated outcome in the mi model.

† Analysis model H does not include the covariate and hence not reported.

‡ Main models of interest, other models provided for comparison purposes.

§ Reported on log-odds scale and based on a true effect of  $\log(1.2)$

**Table S5: Successful convergences in 1000 simulations\***

| 1000 observations  |        |      |      |                |                |                |                |                |      |
|--------------------|--------|------|------|----------------|----------------|----------------|----------------|----------------|------|
|                    | % miss | A    | B    | C <sup>†</sup> | D <sup>†</sup> | E <sup>†</sup> | F <sup>†</sup> | G <sup>†</sup> | H    |
| MCAR               | 20%    | 1000 | 1000 | 1000           | 1000           | 1000           | 1000           | 1000           | 1000 |
|                    | 40%    | 1000 | 1000 | 1000           | 1000           | 1000           | 1000           | 1000           | 1000 |
|                    | 60%    | 999  | 1000 | 1000           | 1000           | 1000           | 1000           | 1000           | 1000 |
|                    | 80%    | 751  | 997  | 993            | 997            | 999            | 866            | 997            | 997  |
| MAR                | 20%    | 1000 | 1000 | 1000           | 1000           | 1000           | 1000           | 1000           | 1000 |
|                    | 40%    | 1000 | 1000 | 1000           | 1000           | 1000           | 1000           | 1000           | 1000 |
|                    | 60%    | 999  | 1000 | 1000           | 1000           | 1000           | 1000           | 1000           | 1000 |
|                    | 80%    | 714  | 997  | 991            | 997            | 998            | 938            | 997            | 997  |
| MNAR               | 20%    | 1000 | 1000 | 1000           | 1000           | 1000           | 1000           | 1000           | 1000 |
|                    | 40%    | 1000 | 1000 | 1000           | 1000           | 1000           | 1000           | 1000           | 1000 |
|                    | 60%    | 996  | 1000 | 1000           | 1000           | 1000           | 1000           | 1000           | 1000 |
|                    | 80%    | 397  | 968  | 887            | 961            | 943            | 855            | 962            | 982  |
| 10000 observations |        |      |      |                |                |                |                |                |      |
|                    | % miss | A    | B    | C <sup>†</sup> | D <sup>†</sup> | E <sup>†</sup> | F <sup>†</sup> | G <sup>†</sup> | H    |
| MCAR               | 20%    | 1000 | 1000 | 1000           | 1000           | 1000           | 1000           | 1000           | 1000 |
|                    | 40%    | 1000 | 1000 | 1000           | 1000           | 1000           | 1000           | 1000           | 1000 |
|                    | 60%    | 1000 | 1000 | 1000           | 1000           | 1000           | 1000           | 1000           | 1000 |
|                    | 80%    | 1000 | 1000 | 1000           | 1000           | 1000           | 1000           | 1000           | 1000 |
| MAR                | 20%    | 1000 | 1000 | 1000           | 1000           | 1000           | 1000           | 1000           | 1000 |
|                    | 40%    | 1000 | 1000 | 1000           | 1000           | 1000           | 1000           | 1000           | 1000 |
|                    | 60%    | 1000 | 1000 | 1000           | 1000           | 1000           | 1000           | 1000           | 1000 |
|                    | 80%    | 1000 | 1000 | 1000           | 1000           | 1000           | 1000           | 1000           | 1000 |
| MNAR               | 20%    | 1000 | 1000 | 1000           | 1000           | 1000           | 1000           | 1000           | 1000 |
|                    | 40%    | 1000 | 1000 | 1000           | 1000           | 1000           | 1000           | 1000           | 1000 |
|                    | 60%    | 1000 | 1000 | 1000           | 1000           | 1000           | 1000           | 1000           | 1000 |
|                    | 80%    | 1000 | 1000 | 1000           | 1000           | 1000           | 1000           | 1000           | 1000 |

\*Analysis model A: complete case analysis (no multiple imputation [mi]); B: no outcome imputation, not included in mi model; C: no outcome imputation, outcome imputed in mi model; D: outcome imputed and included in mi model; E: outcome imputed and included in mi model but then observations where it was imputed are deleted; F as in C but also including a second correlated outcome in the mi model; G as in D but also including a second correlated outcome in the mi model; H as in D but the mi and analysis models do not include the covariate.

† Main models of interest, other models provided for comparison purposes.



Figure S1: Mean Bias (top) and Mean absolute Error (bottom) for exposure E in datasets of 1000 observations, continuous outcome

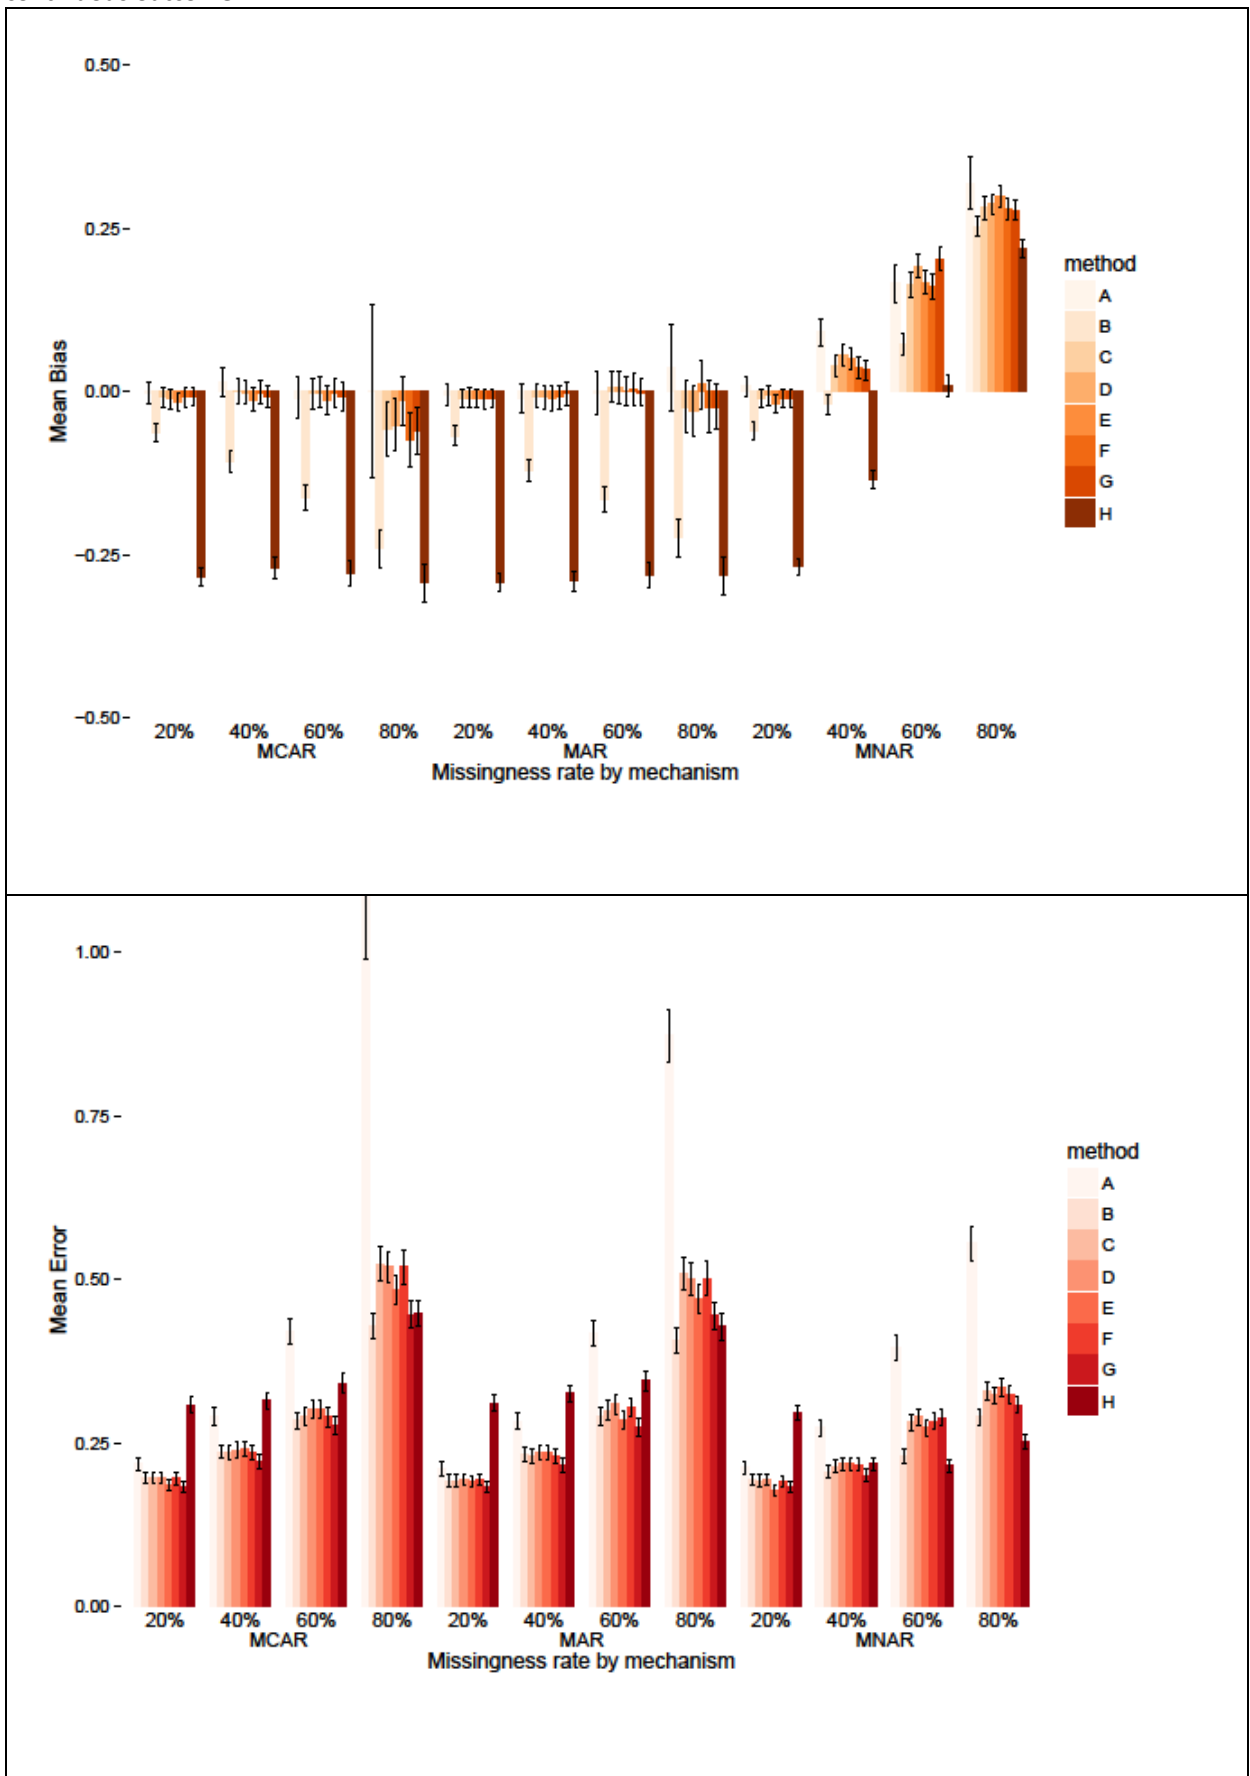

Figure S2: Coverage (top) and Power (bottom) for exposure E in datasets of 1000 observations, continuous outcome

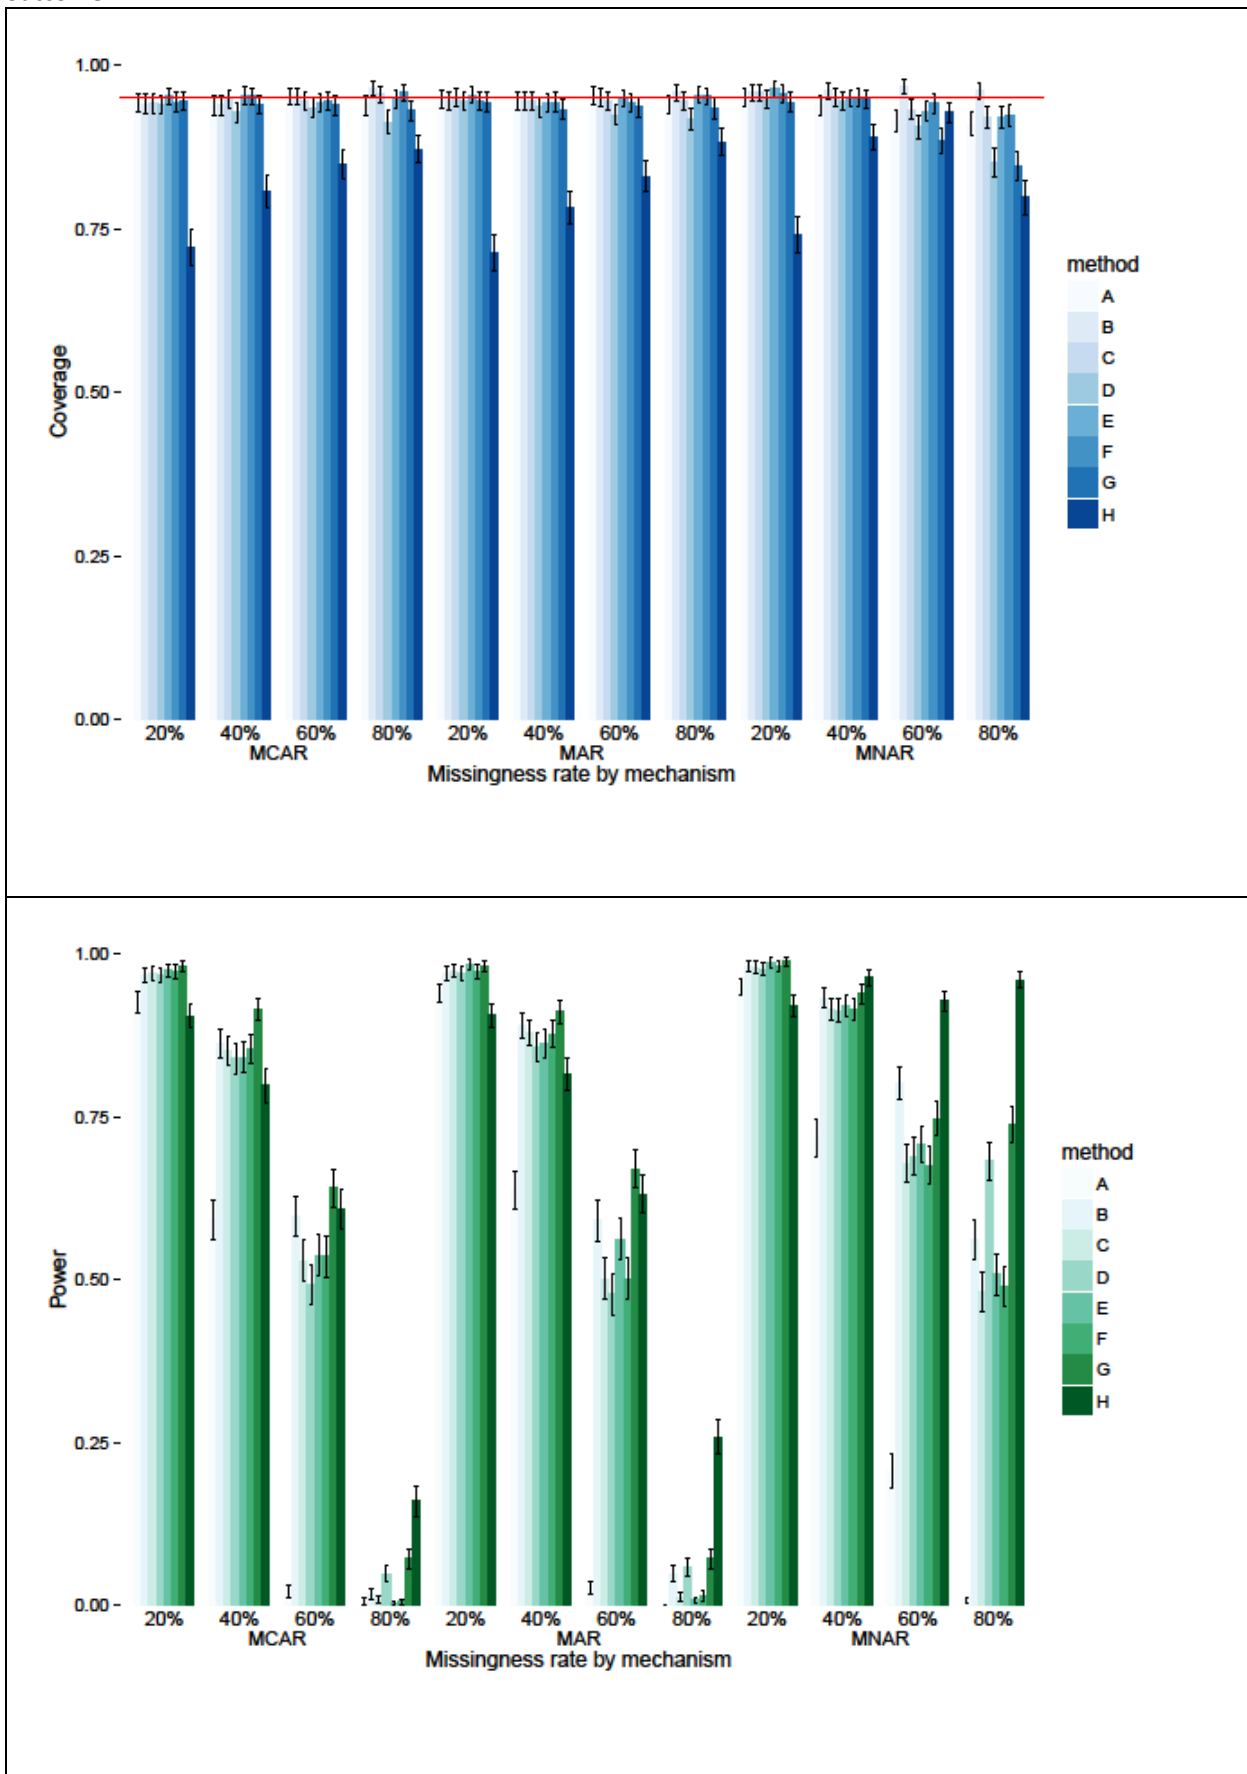

Supplement: MOESM2 [file 11987002]
